# Supplementary material for: Quantification of transplant-derived circulating cell-free DNA in absence of a donor genotype
Source: PubMed Central journal article supplement (PMC5542400; doi:10.1371/journal.pcbi.1005629), 2017-08-03
Supplement: pcbi.1005629.s007.pdf [file pcbi.1005629.s007.pdf]

De Vlaminck et al. 2014

De Vlaminck et al. 2015

This study

Heart transplant recipients  
#patients = 59, #samples = 435

Lung transplant recipients  
#patients = 51, #samples = 382

Bone marrow transplant recipients  
#patients = 8, #samples = 106

DNA of donor and recipient pre-transplant

Purify cfDNA in plasma

Genotyping:  
Illumina whole-genome arrays  
HumanOmni2.5-8 or HumanOmni1

Filtering SNPs that differ from  
hg19 genome build.

Recombination map  
from Kong et al.

Infering dd-cfDNA fraction

Allele frequencies in  
1000 genomes populations

Counting reads allele in each SNP  
using samtools mpileup function

Parallel sequencing:  
Illumina HiSeq 200 or HiSeq 2500  
1 × 50bp or 2 × 100bp

Mapping to hg19 genome build  
using bowtie2

Filtering reads with low quality  
or with p-value > 0.05 of  
non-unique mapping

Filtering reads that their mapping  
is affected by the genotype  
using WASP

Removing duplicate reads

Computing chromosome coverage  
using HTSeq (used as a control)
