# Supplementary material for: Quantification of transplant-derived circulating cell-free DNA in absence of a donor genotype
Source: PLoS Comput Biol. 2017 Aug 3;13(8):e1005629. doi: 10.1371/journal.pcbi.1005629 (PMC5542400; doi:10.1371/journal.pcbi.1005629)
Supplement: S1 Table — Clinical and experimental information and predicted dd-cfDNA levels using two- and one-genome methods of samples drawn from lung transplant recipients. (XLSX) [file pcbi.1005629.s001.xlsx]

## Sheet: Table_S1_lt_samples
Patient	PatientType	Age	DaysPostTransplant	Num_of_Lungs	Biopsy_level	AMR	GotRejectionTreatment	TwoGenomes_cfdDNA	OneGenome_cfdDNA	sequencing_read_length	recipient_array_type	total_mapped_reads	total_reads_mapped_to_genotyped_SNPs	normed_chr1_sequencing_coverage	normed_chrX_sequencing_coverage	normed_chrY_sequencing_coverage
L1	Lung Transplant	53	13	2	NA	0	0	4.27806	3.92247	50bp	HumanOmni1-Quad_v1-0_C	28020142	426872	0.000477156	0.871409	-2.70426
L1	Lung Transplant	53	48	2	NA	0	0	0.31048	0.454599	50bp	HumanOmni1-Quad_v1-0_C	27221974	410623	0.0156379	0.78619	-2.83235
L1	Lung Transplant	53	104	2	NA	0	0	0.20844	0.345557	50bp	HumanOmni1-Quad_v1-0_C	20652541	322555	0.0057337	0.799915	-2.77285
L1	Lung Transplant	53	167	2	NA	0	0	0.32692	0.362014	50bp	HumanOmni1-Quad_v1-0_C	26595791	395388	0.00896761	0.84841	-2.85322
L1	Lung Transplant	53	202	2	NA	0	0	0.11958	0.161197	50bp	HumanOmni1-Quad_v1-0_C	32800823	487599	-0.00271662	0.878371	-2.86371
L1	Lung Transplant	53	209	2	NA	0	0	0.21814	0.323371	50bp	HumanOmni1-Quad_v1-0_C	18785301	283156	0.00524314	0.8516	-2.80243
L1	Lung Transplant	53	283	2	NA	0	0	0.4876	0.435973	50bp	HumanOmni1-Quad_v1-0_C	22485727	332343	-0.00251872	0.855727	-2.85075
L1	Lung Transplant	53	391	2	NA	0	0	0.6134	0.838768	2x100bp	HumanOmni1-Quad_v1-0_C	5196674	196151	-0.0410501	0.95951	-4.53537
L10	Lung Transplant	76	14	1	NA	0	0	0.73524	1.03905	50bp	HumanOmni1-Quad_v1-0_C	22529396	252285	0.0320616	-0.0825419	0.000324306
L10	Lung Transplant	76	52	1	NA	0	0	0.27446	0.702163	50bp	HumanOmni1-Quad_v1-0_C	32277096	366830	0.0402482	-0.0990176	-0.0860086
L10	Lung Transplant	76	73	1	NA	0	0	0.3693	0.681102	50bp	HumanOmni1-Quad_v1-0_C	36852182	413316	0.0347512	-0.0966359	-0.101391
L10	Lung Transplant	76	87	1	0. Normal	0	1	0.31272	0.643211	50bp	HumanOmni1-Quad_v1-0_C	29417896	334348	0.0396826	-0.101541	-0.0787963
L10	Lung Transplant	76	129	1	NA	0	0	0.23972	0.525816	50bp	HumanOmni1-Quad_v1-0_C	28440076	325203	0.044199	-0.108273	-0.0772197
L10	Lung Transplant	76	181	1	0. Normal	0	0	0.30534	0.641439	50bp	HumanOmni1-Quad_v1-0_C	45377805	511767	0.0372467	-0.0855484	-0.0500948
L10	Lung Transplant	76	276	1	NA	0	0	0.37232	0.707366	50bp	HumanOmni1-Quad_v1-0_C	17585690	211152	0.0643517	-0.165182	-0.053669
L10	Lung Transplant	76	367	1	NA	0	0	0.67024	1.71471	2x100bp	HumanOmni1-Quad_v1-0_C	10937460	270312	-0.00599427	0.00308724	-0.0648693
L10	Lung Transplant	76	703	1	NA	0	0	0.39334	1.2754	2x100bp	HumanOmni1-Quad_v1-0_C	9886770	234827	0.00176879	-0.000290392	-0.00145986
L10	Lung Transplant	76	738	1	NA	0	0	0.96678	1.39739	2x100bp	HumanOmni1-Quad_v1-0_C	25150416	619763	0.00351509	-0.0109811	-0.0142588
L11	Lung Transplant	60	14	1	NA	0	0	0.3291	0.305993	50bp	HumanOmni1-Quad_v1-0_C	23614384	347745	-0.0241473	0.95724	-2.63888
L11	Lung Transplant	60	42	1	0. Normal	0	0	0.11826	0.240644	50bp	HumanOmni1-Quad_v1-0_C	23901198	353222	-0.0405097	0.961248	-2.86542
L11	Lung Transplant	60	98	1	NA	0	0	0.14622	0.198049	50bp	HumanOmni1-Quad_v1-0_C	32813728	478663	-0.0561572	0.960149	-3.04159
L11	Lung Transplant	60	140	1	NA	0	0	0.1125	0.177524	50bp	HumanOmni1-Quad_v1-0_C	42574772	631998	-0.0448386	0.933137	-3.11004
L11	Lung Transplant	60	203	1	NA	0	0	0.15926	0.172343	50bp	HumanOmni1-Quad_v1-0_C	37051245	570754	0.00533697	0.806163	-2.97447
L11	Lung Transplant	60	350	1	NA	0	1	0.32372	0.403522	2x100bp	HumanOmni1-Quad_v1-0_C	17326766	626599	-0.0422037	0.951685	-3.99457
L11	Lung Transplant	60	616	1	NA	0	0	-0.01044	0.239245	2x100bp	HumanOmni1-Quad_v1-0_C	19482463	724735	-0.0330177	0.950707	-3.98106
L11	Lung Transplant	60	707	1	NA	0	0	0.5484	0.734325	2x100bp	HumanOmni1-Quad_v1-0_C	15382836	573901	-0.0155001	0.941597	-4.06178
L11	Lung Transplant	60	1071	1	NA	NA	0	0.33744	0.617905	2x100bp	HumanOmni1-Quad_v1-0_C	22404183	566431	-0.0484792	1.02731	-4.08007
L13	Lung Transplant	64	15	2	NA	0	0	1.39782	1.4791	50bp	HumanOmni1-Quad_v1-0_C	36059300	553897	0.0242853	-0.0883337	0.219364
L13	Lung Transplant	64	50	2	NA	0	0	2.40568	2.29536	50bp	HumanOmni1-Quad_v1-0_C	50690353	774003	0.0144913	-0.0636611	0.193979
L13	Lung Transplant	64	64	2	0. Normal	0	0	1.12144	1.21698	2x100bp	HumanOmni1-Quad_v1-0_C	5239832	189638	0.00575085	-0.03809	0.102394
L13	Lung Transplant	64	78	2	NA	0	0	0.79644	0.885902	50bp	HumanOmni1-Quad_v1-0_C	32164442	493052	0.0170905	-0.0711045	0.176557
L13	Lung Transplant	64	107	2	2. Mild	0	1	0.51754	0.591611	50bp	HumanOmni1-Quad_v1-0_C	24731906	380114	0.0166788	-0.0689093	0.182757
L13	Lung Transplant	64	134	2	0. Normal	0	0	0.31114	0.265487	50bp	HumanOmni1-Quad_v1-0_C	29616973	466779	0.0275073	-0.0958731	0.190229
L13	Lung Transplant	64	176	2	0. Normal	0	0	0.34586	0.490164	50bp	HumanOmni1-Quad_v1-0_C	32663026	502009	0.0317653	-0.0972948	0.209754
L13	Lung Transplant	64	302	2	NA	0	0	0.72138	0.706728	50bp	HumanOmni1-Quad_v1-0_C	13862419	206821	0.0260295	-0.0553137	0.290233
L13	Lung Transplant	64	393	2	0. Normal	0	0	0.19476	0.374248	2x100bp	HumanOmni1-Quad_v1-0_C	12370807	456868	0.0064529	-0.0224358	0.161904
L13	Lung Transplant	64	757	2	NA	0	0	0.61274	0.802736	2x100bp	HumanOmni1-Quad_v1-0_C	11919759	414970	0.0263818	-0.0582711	0.0980671
L14	Lung Transplant	66	10	2	NA	0	0	4.6154	4.89147	50bp	HumanOmni1-Quad_v1-0_C	20708269	306698	0.0226095	-0.0826784	0.203128
L14	Lung Transplant	66	55	2	NA	0	0	1.73456	1.69394	50bp	HumanOmni1-Quad_v1-0_C	21160429	314181	0.0333319	-0.100047	0.158803
L14	Lung Transplant	66	87	2	0. Normal	0	0	1.2523	1.45417	50bp	HumanOmni1-Quad_v1-0_C	16287246	243703	0.0291135	-0.102931	0.109892
L14	Lung Transplant	66	108	2	NA	0	0	0.45436	0.587698	50bp	HumanOmni1-Quad_v1-0_C	27334719	405735	0.0296098	-0.0996446	0.132057
L14	Lung Transplant	66	132	2	NA	0	0	0.2071	0.472279	50bp	HumanOmni1-Quad_v1-0_C	21921774	337982	0.031053	-0.108436	0.143977
L14	Lung Transplant	66	157	2	NA	0	0	0.17278	0.309442	50bp	HumanOmni1-Quad_v1-0_C	12978882	201183	0.0233888	-0.0963714	0.157657
L14	Lung Transplant	66	198	2	1. Minimal	0	0	0.45744	0.509953	50bp	HumanOmni1-Quad_v1-0_C	25191662	387457	0.0220548	-0.0944808	0.168794
L14	Lung Transplant	66	297	2	NA	0	0	0.30476	0.639034	50bp	HumanOmni1-Quad_v1-0_C	21674403	318944	-0.0246655	0.00546466	0.219014
L14	Lung Transplant	66	339	2	0. Normal	0	0	0.3899	0.815306	50bp	HumanOmni1-Quad_v1-0_C	21739496	322312	-0.0102534	-0.0259112	0.192976
L14	Lung Transplant	66	590	2	NA	0	0	0.92946	1.10031	50bp	HumanOmni1-Quad_v1-0_C	19083943	280817	-0.0209946	-0.00463173	0.196997
L15	Lung Transplant	65	16	2	NA	0	0	4.15696	3.9844	50bp	HumanOmni1-Quad_v1-0_C	39735911	598044	0.0154415	-0.0550886	0.216384
L15	Lung Transplant	65	41	2	NA	0	0	0.9942	1.06051	50bp	HumanOmni1-Quad_v1-0_C	43266762	655346	0.0149955	-0.0580251	0.130877
L15	Lung Transplant	65	66	2	NA	0	0	0.95014	1.08777	50bp	HumanOmni1-Quad_v1-0_C	29169626	435258	0.0324105	-0.0954056	0.109134
L15	Lung Transplant	65	111	2	NA	0	0	0.55338	0.586287	50bp	HumanOmni1-Quad_v1-0_C	44003363	667931	0.0181562	-0.0553215	0.1546
L15	Lung Transplant	65	174	2	NA	0	0	0.72214	0.976788	50bp	HumanOmni1-Quad_v1-0_C	23177447	352658	0.014	-0.0599714	0.155868
L15	Lung Transplant	65	216	2	0. Normal	0	0	1.02066	1.25707	50bp	HumanOmni1-Quad_v1-0_C	21578113	311017	-0.0236582	-0.00577579	0.145816
L15	Lung Transplant	65	328	2	0. Normal	0	0	0.95534	1.18361	50bp	HumanOmni1-Quad_v1-0_C	20286513	293412	-0.0214201	0	0.200357
L15	Lung Transplant	65	534	2	NA	0	0	2.27378	2.42598	50bp	HumanOmni1-Quad_v1-0_C	14524266	213427	-0.0045464	0.0122424	0.209205
L15	Lung Transplant	65	700	2	NA	0	0	0.71406	1.14768	50bp	HumanOmni1-Quad_v1-0_C	18517286	270226	-0.0119054	0.0153819	0.21086
L16	Lung Transplant	62	16	2	NA	0	0	3.18554	3.10117	50bp	HumanOmni1-Quad_v1-0_C	41806440	638295	0.0171233	-0.0155578	0.0984041
L16	Lung Transplant	62	43	2	NA	0	0	1.51314	1.53788	50bp	HumanOmni1-Quad_v1-0_C	38938675	597207	0.0225045	-0.0523401	0.0731716
L16	Lung Transplant	62	58	2	0. Normal	0	0	0.29006	0.530856	50bp	HumanOmni1-Quad_v1-0_C	28685843	455229	0.0607407	-0.17794	0.0316679
L16	Lung Transplant	62	107	2	NA	0	0	0.50248	0.499752	50bp	HumanOmni1-Quad_v1-0_C	27728776	447409	0.0705214	-0.188063	0.0206742
L16	Lung Transplant	62	145	2	0. Normal	0	0	0.93368	0.982817	50bp	HumanOmni1-Quad_v1-0_C	40416895	617227	0.032443	-0.0821919	0.110053
L16	Lung Transplant	62	193	2	NA	NA	0	0.59562	0.992033	50bp	HumanOmni1-Quad_v1-0_C	14311903	214646	0.04785	-0.114624	0.147206
L16	Lung Transplant	62	702	2	0. Normal	0	0	1.67746	1.79322	2x100bp	HumanOmni1-Quad_v1-0_C	14959892	518921	0.00930398	-0.010521	0.0853531
L17	Lung Transplant	66	10	1	NA	0	0	2.41648	2.75999	50bp	HumanOmni1-Quad_v1-0_C	17535484	263037	0.00514075	0.835851	-2.49331
L17	Lung Transplant	66	44	1	NA	NA	0	1.17368	1.54829	50bp	HumanOmni1-Quad_v1-0_C	10037887	152825	0.0148046	0.816951	-2.68295
L17	Lung Transplant	66	62	1	NA	0	0	1.00172	1.13578	50bp	HumanOmni1-Quad_v1-0_C	14982104	228179	0.0103812	0.820313	-2.71911
L17	Lung Transplant	66	87	1	NA	0	0	1.0324	0.86473	50bp	HumanOmni1-Quad_v1-0_C	9549656	145481	0.0147019	0.795125	-2.72111
L17	Lung Transplant	66	132	1	0. Normal	0	0	0.15544	0.266484	50bp	HumanOmni1-Quad_v1-0_C	11570801	174596	-0.00537243	0.8673	-2.69373
L17	Lung Transplant	66	177	1	NA	0	0	-0.01842	0.0532591	50bp	HumanOmni1-Quad_v1-0_C	16243297	253989	-0.0041873	0.861496	-2.85609
L17	Lung Transplant	66	272	1	NA	0	0	0.40904	0.510542	50bp	HumanOmni1-Quad_v1-0_C	33713159	503455	0.0046333	0.87671	-2.83497
L17	Lung Transplant	66	363	1	NA	0	0	0.30812	0.734512	50bp	HumanOmni1-Quad_v1-0_C	19713035	285760	-0.0413937	0.939056	-2.9081
L17	Lung Transplant	66	399	1	2. Mild	0	1	0.58446	0.972554	50bp	HumanOmni1-Quad_v1-0_C	17799299	258663	-0.0393682	0.941811	-2.87018
L17	Lung Transplant	66	521	1	NA	NA	0	0.4227	0.735996	50bp	HumanOmni1-Quad_v1-0_C	18734809	270160	-0.0716363	0.984758	-2.87623
L19	Lung Transplant	26	15	2	NA	0	0	10.4613	11.9335	50bp	HumanOmni1-Quad_v1-0_C	32091322	218529	0.0103044	-0.0590554	0.244807
L19	Lung Transplant	26	42	2	NA	0	0	4.29016	6.33372	50bp	HumanOmni1-Quad_v1-0_C	27915365	191083	0.0146546	-0.0738505	0.224987
L19	Lung Transplant	26	57	2	NA	0	0	3.114	5.07328	50bp	HumanOmni1-Quad_v1-0_C	32541279	223814	0.0258487	-0.0951677	0.243776
L19	Lung Transplant	26	84	2	NA	0	0	3.31818	5.24305	50bp	HumanOmni1-Quad_v1-0_C	51747769	353993	0.0292292	-0.0896843	0.206505
L19	Lung Transplant	26	579	2	NA	0	0	10.6759	11.3837	2x100bp	HumanOmni1-Quad_v1-0_C	11725259	211266	0.0197153	-0.0507081	0.170133
L19	Lung Transplant	26	698	2	3. Moderate	1	1	11.6916	14.4165	2x100bp	HumanOmni1-Quad_v1-0_C	11124648	195132	0.0220756	-0.0525243	0.154688
L2	Lung Transplant	40	633	2	NA	0	0	1.29992	1.68834	2x100bp	HumanOmni2.5-8v1_A	4274341	311461	0.0278207	-0.0583513	0.0703678
L2	Lung Transplant	40	773	2	NA	0	0	0.45098	0.879355	2x100bp	HumanOmni2.5-8v1_A	5517255	451177	0.018359	-0.0344934	0.168932
L20	Lung Transplant	54	26	2	NA	0	0	3.20274	3.40353	50bp	HumanOmni25M-8v1-1_B	22674335	768589	-0.0570615	0.936352	-2.62668
L20	Lung Transplant	54	43	2	NA	0	0	1.62194	1.9192	50bp	HumanOmni25M-8v1-1_B	18706726	646062	-0.0270404	0.895694	-2.78914
L20	Lung Transplant	54	57	2	NA	0	0	0.79694	1.17186	50bp	HumanOmni25M-8v1-1_B	19390162	657842	-0.0467735	0.919462	-2.91639
L20	Lung Transplant	54	92	2	0. Normal	0	0	0.359	1.24725	50bp	HumanOmni25M-8v1-1_B	16306555	560878	-0.0461714	0.898343	-2.95628
L20	Lung Transplant	54	127	2	NA	0	0	0.22198	0.374521	50bp	HumanOmni25M-8v1-1_B	19302288	659469	-0.0573795	0.93159	-2.97983
L20	Lung Transplant	54	274	2	NA	0	0	0.06424	0.287578	50bp	HumanOmni25M-8v1-1_B	22767442	777788	-0.0558926	0.939787	-3.05376
L20	Lung Transplant	54	389	2	1. Minimal	0	0	0.15766	0.392478	50bp	HumanOmni25M-8v1-1_B	19906301	680308	-0.0387476	0.92238	-2.9998
L20	Lung Transplant	54	690	2	NA	0	0	0.58988	0.800457	2x100bp	HumanOmni25M-8v1-1_B	4496720	373371	-0.00911017	0.903172	-4.09695
L20	Lung Transplant	54	1080	2	0. Normal	0	1	5.35938	5.24292	2x100bp	HumanOmni25M-8v1-1_B	22312009	1201430	-0.0648729	0.994515	-3.09094
L21	Lung Transplant	65	330	2	NA	0	0	1.0731	1.22782	2x100bp	HumanOmni2.5-8v1_A	13785532	945798	0.0160864	-0.0415659	-0.0428365
L21	Lung Transplant	65	402	2	0. Normal	0	0	1.50672	1.46184	2x100bp	HumanOmni2.5-8v1_A	15026213	1208057	0.0162047	-0.0375712	-0.0533799
L21	Lung Transplant	65	581	2	NA	0	0	0.50194	0.959877	2x100bp	HumanOmni2.5-8v1_A	18095360	1399374	0.000819099	-0.0132269	-0.00850089
L21	Lung Transplant	65	699	2	0. Normal	0	0	0.8257	1.04585	2x100bp	HumanOmni2.5-8v1_A	15603002	1079079	0.00885795	-0.0227447	-0.0272543
L22	Lung Transplant	60	739	2	NA	0	1	3.6382	3.99703	2x100bp	HumanOmni25M-8v1-1_B	18622920	1396631	0.0130124	-0.0304597	0.131202
L24	Lung Transplant	55	49	2	NA	0	0	1.27046	1.39772	50bp	HumanOmni1-Quad_v1-0_C	19498025	295842	-0.00383962	0.855651	-2.75788
L24	Lung Transplant	55	65	2	NA	0	0	1.02388	1.23744	50bp	HumanOmni1-Quad_v1-0_C	20954660	313043	-0.0199497	0.893258	-2.81567
L24	Lung Transplant	55	79	2	NA	0	0	1.42186	1.48463	50bp	HumanOmni1-Quad_v1-0_C	15150890	231986	-0.00737488	0.853919	-2.76104
L24	Lung Transplant	55	86	2	NA	0	0	1.21016	1.41683	50bp	HumanOmni1-Quad_v1-0_C	19497062	294847	-0.00650302	0.862142	-2.8057
L24	Lung Transplant	55	100	2	NA	0	0	0.72534	0.863433	50bp	HumanOmni1-Quad_v1-0_C	14863156	225992	-0.00635996	0.864652	-2.82339
L24	Lung Transplant	55	135	2	NA	0	0	0.05954	0.322513	50bp	HumanOmni1-Quad_v1-0_C	16862427	258007	0	0.824668	-2.99563
L24	Lung Transplant	55	166	2	NA	0	0	0.44922	0.565966	50bp	HumanOmni1-Quad_v1-0_C	17510300	267761	0.00838351	0.806245	-2.81432
L24	Lung Transplant	55	667	2	NA	0	0	0.88354	1.30775	2x100bp	HumanOmni1-Quad_v1-0_C	10801143	389987	-0.0293058	0.943611	-3.7968
L25	Lung Transplant	29	75	2	0. Normal	0	0	0.6007	0.915128	2x100bp	HumanOmni25M-8v1-1_B	12055085	1041259	0.0207257	-0.0368458	0.118641
L25	Lung Transplant	29	375	2	0. Normal	0	0	3.19344	3.66522	2x100bp	HumanOmni25M-8v1-1_B	12036442	1028594	0.0144179	-0.00943894	0.200728
L25	Lung Transplant	29	563	2	NA	0	0	0.4191	0.455735	2x100bp	HumanOmni25M-8v1-1_B	13587093	1156495	0.0178203	-0.0351746	0.143145
L25	Lung Transplant	29	707	2	NA	0	0	0.96578	1.21203	2x100bp	HumanOmni25M-8v1-1_B	13908227	1179035	0.018705	-0.0447285	0.161148
L25	Lung Transplant	29	1027	2	NA	NA	0	0.79986	0.811514	2x100bp	HumanOmni25M-8v1-1_B	23027223	1277667	-0.0218671	0.0409164	0.229029
L26	Lung Transplant	55	374	2	2. Mild	0	1	1.62518	1.64779	50bp	HumanOmni25M-8v1-1_B	26962794	883542	-0.0401021	0.929874	-2.93006
L26	Lung Transplant	55	511	2	NA	0	0	0.64138	1.11562	50bp	HumanOmni25M-8v1-1_B	14707087	480161	-0.0475072	0.943918	-2.94063
L26	Lung Transplant	55	749	2	NA	0	0	1.16884	1.29192	2x100bp	HumanOmni25M-8v1-1_B	9786640	807653	-0.0165911	0.933411	-3.80412
L26	Lung Transplant	55	1061	2	NA	0	0	1.06618	0.917569	2x100bp	HumanOmni25M-8v1-1_B	4615200	280387	-0.0614871	1.03126	-4.20858
L26	Lung Transplant	55	1096	2	0. Normal	NA	0	0.54314	0.980044	2x100bp	HumanOmni25M-8v1-1_B	8772381	700337	-0.0534862	1.02339	-3.68287
L28	Lung Transplant	65	46	2	NA	0	0	1.03722	1.31331	2x100bp	HumanOmni1-Quad_v1-0_C	9538343	282699	-0.00801065	0.915566	-3.76295
L28	Lung Transplant	65	151	2	NA	0	0	0.00732	0.217344	2x100bp	HumanOmni1-Quad_v1-0_C	7581893	234491	-0.0128887	0.926174	-3.8246
L28	Lung Transplant	65	287	2	0. Normal	0	1	0.44148	0.490492	2x100bp	HumanOmni1-Quad_v1-0_C	11246710	346942	-0.0108961	0.970663	-3.66146
L28	Lung Transplant	65	357	2	NA	NA	1	0.19902	0.28885	2x100bp	HumanOmni1-Quad_v1-0_C	11436418	346122	-0.0152443	0.954527	-3.74101
L29	Lung Transplant	57	35	2	NA	0	0	1.44682	2.00597	50bp	HumanOmni25M-8v1-1_B	15189810	533652	-0.0282198	-0.00338598	0.138248
L29	Lung Transplant	57	41	2	NA	0	0	3.63894	4.15595	50bp	HumanOmni25M-8v1-1_B	16898565	593626	-0.0220824	-0.00557004	0.142999
L29	Lung Transplant	57	57	2	NA	0	0	0.53486	0.650365	50bp	HumanOmni25M-8v1-1_B	13582259	480565	0.00183502	-0.0526706	0.0408962
L29	Lung Transplant	57	64	2	NA	0	0	0.6543	0.76465	50bp	HumanOmni25M-8v1-1_B	17814024	626959	-0.000715053	-0.0357048	0.0590645
L29	Lung Transplant	57	78	2	NA	0	0	0.33826	0.61087	50bp	HumanOmni25M-8v1-1_B	16266698	576979	0.00330972	-0.0436425	0.0566029
L29	Lung Transplant	57	130	2	0. Normal	0	0	0.76708	1.05099	50bp	HumanOmni25M-8v1-1_B	17312176	615252	0.00393432	-0.0560349	0.0608537
L29	Lung Transplant	57	162	2	NA	0	0	0.01644	0.402108	50bp	HumanOmni25M-8v1-1_B	13287396	472056	0.0058965	-0.0534176	0.0676948
L29	Lung Transplant	57	193	2	0. Normal	0	0	0.20188	0.531182	50bp	HumanOmni25M-8v1-1_B	13753778	487406	0.00525189	-0.0545643	0.0847239
L29	Lung Transplant	57	293	2	0. Normal	0	1	0.09114	0.331898	2x100bp	HumanOmni25M-8v1-1_B	16460074	1241205	0.00716893	-0.0295738	0.0622593
L29	Lung Transplant	57	403	2	0. Normal	0	0	0.28964	0.284888	2x100bp	HumanOmni25M-8v1-1_B	14336377	1148326	-0.00955003	-0.00520427	0.0965411
L29	Lung Transplant	57	534	2	NA	0	0	0.41122	0.57881	2x100bp	HumanOmni25M-8v1-1_B	17348686	1262988	0.0230968	-0.0618271	-0.0150364
L29	Lung Transplant	57	631	2	NA	0	0	0.1578	0.403028	2x100bp	HumanOmni25M-8v1-1_B	10228078	808625	0.0188287	-0.0406283	-0.0298932
L29	Lung Transplant	57	895	2	0. Normal	0	1	0.50238	0.724076	2x100bp	HumanOmni25M-8v1-1_B	15081604	1246470	0.0123206	-0.0460515	-0.00415226
L3	Lung Transplant	63	14	2	NA	0	0	25.5657	24.9298	2x100bp	HumanOmni25M-8v1-1_B	7349247	504484	-0.0213747	0.0249207	0.198633
L3	Lung Transplant	63	44	2	NA	0	0	3.55438	3.5503	2x100bp	HumanOmni25M-8v1-1_B	12730893	941859	0.0105373	-0.0256256	0.149399
L3	Lung Transplant	63	62	2	NA	0	0	0.56186	0.631954	2x100bp	HumanOmni25M-8v1-1_B	13150308	995566	0.00312776	-0.00438755	0.160613
L30	Lung Transplant	54	28	2	NA	0	0	2.41296	2.45771	2x100bp	HumanOmni2.5-8v1_A	11328921	839327	-0.0193631	0.0134192	0.225878
L30	Lung Transplant	54	39	2	NA	0	0	1.80064	1.61213	2x100bp	HumanOmni2.5-8v1_A	8987478	657853	-0.0106781	0.0069462	0.202599
L30	Lung Transplant	54	53	2	NA	0	0	0.45708	0.585518	2x100bp	HumanOmni2.5-8v1_A	12942996	1040005	-0.0171601	0.00444646	0.222307
L30	Lung Transplant	54	103	2	0. Normal	0	0	0.59012	0.860138	2x100bp	HumanOmni2.5-8v1_A	9281389	661942	-0.000545553	-0.0147821	0.188951
L30	Lung Transplant	54	158	2	NA	0	0	0.98856	0.923631	2x100bp	HumanOmni2.5-8v1_A	9418622	720622	0.00810025	-0.0284322	0.187594
L30	Lung Transplant	54	186	2	0. Normal	0	0	1.97666	2.3311	2x100bp	HumanOmni2.5-8v1_A	13751909	1046534	0.0157907	-0.0426879	0.165009
L30	Lung Transplant	54	456	2	2. Mild	0	1	1.18042	1.48943	2x100bp	HumanOmni2.5-8v1_A	13448613	1075410	-0.00184636	-0.0036449	0.145139
L30	Lung Transplant	54	488	2	0. Normal	0	0	0.7529	0.981645	2x100bp	HumanOmni2.5-8v1_A	8970316	727892	-0.0105237	0.00399516	0.216273
L30	Lung Transplant	54	554	2	NA	0	1	1.2312	2.54701	2x100bp	HumanOmni2.5-8v1_A	19399544	1508703	-0.00501346	-0.00695888	0.206505
L31	Lung Transplant	68	20	2	NA	0	0	4.0578	4.72743	50bp	HumanOmni25M-8v1-1_B	16931130	589317	-0.00124661	0.0218578	0.0883997
L31	Lung Transplant	68	54	2	0. Normal	0	0	2.1577	2.32457	50bp	HumanOmni25M-8v1-1_B	16448240	581510	-0.0211384	0.0262947	0.0915713
L31	Lung Transplant	68	90	2	0. Normal	0	0	0.91356	0.953395	50bp	HumanOmni25M-8v1-1_B	14375780	510263	0.00437652	-0.0152421	0.0354708
L31	Lung Transplant	68	139	2	NA	0	0	0.20624	0.255396	50bp	HumanOmni25M-8v1-1_B	16788603	596648	-0.000242735	-0.0378707	0.10181
L31	Lung Transplant	68	167	2	0. Normal	0	0	0.18808	0.360597	50bp	HumanOmni25M-8v1-1_B	15217733	540358	0.00016151	-0.037316	0.103798
L31	Lung Transplant	68	209	2	NA	0	0	0.35754	0.669398	50bp	HumanOmni25M-8v1-1_B	16163020	574147	0.00135782	-0.0263929	0.13789
L31	Lung Transplant	68	251	2	NA	0	0	1.13172	1.49649	2x100bp	HumanOmni25M-8v1-1_B	10473203	808473	0.00742502	0.00647688	0.101596
L31	Lung Transplant	68	373	2	0. Normal	0	0	0.07584	0.556106	2x100bp	HumanOmni25M-8v1-1_B	13238734	1092316	0.0033912	-0.00994231	0.11921
L31	Lung Transplant	68	384	2	NA	0	0	0.18508	0.447337	2x100bp	HumanOmni25M-8v1-1_B	9291280	718062	-0.00202274	-0.000187864	0.1103
L31	Lung Transplant	68	594	2	NA	0	0	0.57642	0.678227	2x100bp	HumanOmni25M-8v1-1_B	11825454	966681	-0.00910998	0.0158158	0.167072
L31	Lung Transplant	68	748	2	NA	NA	NA	1.17476	1.21088	2x100bp	HumanOmni25M-8v1-1_B	28686898	2320880	0.0163573	-0.013085	0.0929181
L33	Lung Transplant	69	14	2	NA	0	0	0.77752	0.902421	2x100bp	HumanOmni2.5-8v1_A	8127111	607527	-0.0121214	0.0167043	-0.16338
L33	Lung Transplant	69	38	2	NA	0	0	1.59792	1.83237	2x100bp	HumanOmni2.5-8v1_A	12611822	905005	0.00347348	-0.00879836	-0.232255
L33	Lung Transplant	69	55	2	NA	0	0	1.09476	1.2203	2x100bp	HumanOmni2.5-8v1_A	12814739	900105	-0.00318074	-0.0117998	-0.253783
L33	Lung Transplant	69	66	2	NA	0	0	1.25412	1.39736	2x100bp	HumanOmni2.5-8v1_A	9514789	676261	0.00364998	-0.0112034	-0.223696
L33	Lung Transplant	69	98	2	0. Normal	0	0	0.86576	1.17458	2x100bp	HumanOmni2.5-8v1_A	30638448	2321289	0.0115269	-0.0151364	-0.216266
L33	Lung Transplant	69	143	2	2. Mild	1	1	0.09684	0.311822	2x100bp	HumanOmni2.5-8v1_A	13223193	906344	0.00697376	-0.0204855	-0.148192
L33	Lung Transplant	69	189	2	0. Normal	1	1	0.09812	0.749326	50bp	HumanOmni2.5-8v1_A	27667961	864496	-0.0290913	0.0172963	-0.00695743
L33	Lung Transplant	69	256	2	NA	0	0	0.45124	0.602764	2x100bp	HumanOmni2.5-8v1_A	11856767	833122	0.00307345	-0.00943875	0.00099713
L34	Lung Transplant	25	16	2	NA	0	0	3.33216	3.18001	2x100bp	HumanOmni2.5-8v1_A	11532110	851405	0.0146947	-0.00107945	0.231373
L34	Lung Transplant	25	53	2	NA	0	0	1.96214	1.71294	2x100bp	HumanOmni2.5-8v1_A	11625122	933953	0.0138581	-0.0119379	0.225171
L34	Lung Transplant	25	85	2	0. Normal	0	0	0.97748	1.20648	2x100bp	HumanOmni2.5-8v1_A	14206234	1162018	0.0171921	-0.00947141	0.241146
L34	Lung Transplant	25	204	2	0. Normal	0	0	0.98872	0.982991	2x100bp	HumanOmni2.5-8v1_A	18289013	1303437	0.0372679	-0.0691167	0.120481
L34	Lung Transplant	25	550	2	0. Normal	0	1	6.85372	7.42442	50bp	HumanOmni2.5-8v1_A	21484727	714698	-0.0160002	-0.0106931	0.219282
L35	Lung Transplant	58	13	2	NA	0	0	1.10496	1.04749	2x100bp	HumanOmni2.5-8v1_A	28736277	2204148	0.00429811	-0.0180252	0.141294
L35	Lung Transplant	58	35	2	NA	0	0	1.07912	1.04132	2x100bp	HumanOmni2.5-8v1_A	22937275	1787017	0.00755195	-0.0202526	0.135989
L35	Lung Transplant	58	62	2	NA	0	0	0.23434	0.279302	2x100bp	HumanOmni2.5-8v1_A	20846595	1591916	0.00545958	-0.0185023	0.11612
L35	Lung Transplant	58	90	2	0. Normal	0	0	0.14778	0.161046	2x100bp	HumanOmni2.5-8v1_A	19181600	1440010	0.000986684	-0.00704023	0.14009
L35	Lung Transplant	58	125	2	0. Normal	0	0	0.09648	0.171003	2x100bp	HumanOmni2.5-8v1_A	23188819	1792382	0.00977493	-0.031349	0.119546
L35	Lung Transplant	58	157	2	NA	0	0	0.1422	0.150918	2x100bp	HumanOmni2.5-8v1_A	21061148	1645382	0.006624	-0.028619	0.119665
L35	Lung Transplant	58	199	2	0. Normal	0	0	0.29334	0.347464	2x100bp	HumanOmni2.5-8v1_A	27955344	2177819	0.0294367	-0.0622199	0.106393
L35	Lung Transplant	58	731	2	NA	0	0	0.69484	0.791502	2x100bp	HumanOmni2.5-8v1_A	45576151	3698269	0.0338597	-0.076351	0.0980029
L36	Lung Transplant	23	18	2	NA	0	0	0.46716	0.53662	2x100bp	HumanOmni2.5-8v1_A	23106966	1788835	-0.0233772	0.944016	-3.84018
L36	Lung Transplant	23	58	2	NA	0	0	0.89432	0.850215	2x100bp	HumanOmni2.5-8v1_A	21801954	1665587	-0.0156475	0.919195	-3.7524
L36	Lung Transplant	23	91	2	NA	0	0	0.69794	0.651888	2x100bp	HumanOmni2.5-8v1_A	24052276	1911223	-0.0157782	0.924597	-3.83762
L36	Lung Transplant	23	112	2	1. Minimal	0	1	0.4391	0.479917	2x100bp	HumanOmni2.5-8v1_A	20654529	1487935	-0.00896655	0.919337	-3.98596
L36	Lung Transplant	23	179	2	0. Normal	0	1	-0.01976	0.197726	2x100bp	HumanOmni2.5-8v1_A	10138239	804119	-0.00840585	0.934302	-3.78063
L36	Lung Transplant	23	278	2	NA	0	1	3.6999	3.34278	2x100bp	HumanOmni2.5-8v1_A	21108417	1643224	-0.00583618	0.893972	-3.28655
L36	Lung Transplant	23	367	2	3. Moderate	0	1	14.7069	13.5813	2x100bp	HumanOmni2.5-8v1_A	16453021	1282829	-0.00367556	0.819043	-2.21241
L36	Lung Transplant	23	431	2	0. Normal	0	1	22.8878	21.6911	2x100bp	HumanOmni2.5-8v1_A	18934435	1467441	-0.00845154	0.76927	-1.70374
L36	Lung Transplant	23	550	2	NA	0	1	9.31538	9.29729	50bp	HumanOmni2.5-8v1_A	15061328	502419	-0.030794	0.879054	-2.05445
L36	Lung Transplant	23	732	2	NA	0	1	4.6191	3.63773	2x100bp	HumanOmni2.5-8v1_A	18437508	1471283	-0.017657	0.92305	-3.14281
L4	Lung Transplant	29	787	2	NA	0	0	0.5217	0.556007	2x100bp	HumanOmni2.5-8v1_A	8235562	531543	-0.0108259	0.939481	-4.25193
L4	Lung Transplant	29	1099	2	NA	NA	0	0.26606	0.456423	2x100bp	HumanOmni2.5-8v1_A	18899097	984833	-0.0582293	1.02809	-4.2281
L41	Lung Transplant	63	36	2	NA	0	0	1.1266	1.2945	50bp	HumanOmni1-Quad_v1-0_C	19341343	282467	-0.0152429	-0.00953101	-0.456851
L41	Lung Transplant	63	50	2	NA	0	0	0.96556	1.13093	50bp	HumanOmni1-Quad_v1-0_C	18643356	271052	-0.0168081	-0.0117633	-0.482131
L41	Lung Transplant	63	92	2	1. Minimal	0	1	0.32862	0.353747	50bp	HumanOmni1-Quad_v1-0_C	18533206	271317	-0.00687699	-0.0241919	-0.0671798
L41	Lung Transplant	63	120	2	0. Normal	0	0	1.56116	1.7931	50bp	HumanOmni1-Quad_v1-0_C	16903025	261051	0.0450194	-0.138578	-0.121083
L41	Lung Transplant	63	134	2	NA	0	0	0.2777	0.626107	50bp	HumanOmni1-Quad_v1-0_C	21210634	311079	-0.0183223	0.00306751	-0.0488263
L41	Lung Transplant	63	364	2	NA	0	0	0.304	0.508953	50bp	HumanOmni1-Quad_v1-0_C	19645109	286845	-0.00951786	-0.0190874	0.0677548
L41	Lung Transplant	63	417	2	0. Normal	0	0	3.7217	3.83113	50bp	HumanOmni1-Quad_v1-0_C	18835915	276692	-0.0105065	-0.0235204	0.063958
L41	Lung Transplant	63	575	2	NA	0	0	1.14754	1.36959	50bp	HumanOmni1-Quad_v1-0_C	30358020	443876	-0.0112888	0.000831256	-0.0363247
L41	Lung Transplant	63	694	2	0. Normal	1	1	3.8124	3.9631	2x100bp	HumanOmni1-Quad_v1-0_C	23193655	879692	0.0137584	-0.0306798	-0.026689
L41	Lung Transplant	63	813	2	NA	1	1	4.71704	4.86453	2x100bp	HumanOmni1-Quad_v1-0_C	13921725	522595	0.0136679	-0.0438561	-0.121144
L41	Lung Transplant	63	837	2	NA	1	1	5.3381	4.976	2x100bp	HumanOmni1-Quad_v1-0_C	10854093	410413	0.009251	-0.0313399	-0.150234
L49	Lung Transplant	73	13	1	0. Normal	0	0	0.63176	0.723229	2x100bp	HumanOmni2.5-8v1_A	13556328	1010990	-0.0290868	0.942606	-3.94589
L49	Lung Transplant	73	69	1	0. Normal	0	0	0.24542	0.540785	2x100bp	HumanOmni2.5-8v1_A	15488426	1157613	-0.0447604	0.925985	-3.96804
L49	Lung Transplant	73	104	1	NA	0	0	0.17948	0.188754	2x100bp	HumanOmni2.5-8v1_A	19279205	1498454	-0.0374093	0.914876	-3.92592
L49	Lung Transplant	73	132	1	NA	0	0	0.07974	0.211757	2x100bp	HumanOmni2.5-8v1_A	21260203	1587833	-0.0316968	0.904109	-3.99709
L49	Lung Transplant	73	241	1	NA	0	0	0.14182	0.169272	2x100bp	HumanOmni2.5-8v1_A	20778712	1400344	-0.0703002	0.967402	-3.92399
L49	Lung Transplant	73	298	1	NA	0	0	0.16106	0.815345	2x100bp	HumanOmni2.5-8v1_A	11181284	773293	-0.0713566	0.999583	-3.78654
L49	Lung Transplant	73	352	1	3. Moderate	0	1	0.90596	1.0377	2x100bp	HumanOmni2.5-8v1_A	16949589	1318267	-0.0324316	0.94847	-3.95859
L49	Lung Transplant	73	418	1	4. Severe	0	1	0.64416	0.787521	2x100bp	HumanOmni2.5-8v1_A	12413896	914137	-0.0394996	0.954975	-3.8553
L49	Lung Transplant	73	433	1	NA	0	0	0.25684	0.239816	2x100bp	HumanOmni2.5-8v1_A	14462674	1099940	-0.034846	0.941499	-3.93519
L49	Lung Transplant	73	450	1	NA	0	1	-0.06682	0.240527	2x100bp	HumanOmni2.5-8v1_A	15185211	1165196	-0.0280912	0.886863	-3.98438
L49	Lung Transplant	73	492	1	3. Moderate	0	1	0.76662	0.834858	2x100bp	HumanOmni2.5-8v1_A	33991880	2615190	-0.0557892	1.00183	-3.82091
L49	Lung Transplant	73	748	1	NA	0	1	0.27148	0.353519	2x100bp	HumanOmni2.5-8v1_A	13218556	1053467	-0.0484687	0.968165	-3.79572
L5	Lung Transplant	60	21	2	NA	0	0	1.10774	1.34277	50bp	HumanOmni1-Quad_v1-0_C	17094491	260355	-0.00461074	0.879769	-3.05367
L5	Lung Transplant	60	80	2	NA	0	0	0.67166	0.742275	50bp	HumanOmni1-Quad_v1-0_C	15532928	236372	-0.00596104	0.856214	-3.0937
L5	Lung Transplant	60	101	2	NA	0	0	0.48076	0.558269	50bp	HumanOmni1-Quad_v1-0_C	19287224	291202	-0.00853285	0.857505	-2.97166
L5	Lung Transplant	60	175	2	NA	0	0	0.24734	0.353387	50bp	HumanOmni1-Quad_v1-0_C	13703119	209404	0.00792692	0.826574	-3.01031
L5	Lung Transplant	60	210	2	NA	0	0	0.27372	0.811453	50bp	HumanOmni1-Quad_v1-0_C	34171580	179816	-0.0303438	0.892484	-4.20485
L5	Lung Transplant	60	374	2	NA	NA	0	0.52214	0.713218	2x100bp	HumanOmni1-Quad_v1-0_C	9313200	350537	-0.0327999	0.964232	-4.12132
L5	Lung Transplant	60	409	2	NA	NA	0	0.64574	0.794744	2x100bp	HumanOmni1-Quad_v1-0_C	15295386	591298	-0.0268074	0.953142	-4.26796
L5	Lung Transplant	60	626	2	NA	NA	0	0.67636	0.967662	2x100bp	HumanOmni1-Quad_v1-0_C	9561853	338503	-0.0295954	0.954463	-4.13905
L50	Lung Transplant	22	20	2	NA	0	0	3.42572	3.64609	2x100bp	HumanOmni25M-8v1-1_B	21648222	1680291	0.0156331	0.0170167	0.111655
L50	Lung Transplant	22	59	2	NA	0	0	2.15872	2.35323	2x100bp	HumanOmni25M-8v1-1_B	17692897	1302060	0.00447592	0.0179524	0.163332
L50	Lung Transplant	22	94	2	NA	0	0	2.02702	2.39027	2x100bp	HumanOmni25M-8v1-1_B	16120758	1172195	0.0142661	0.0079961	0.159925
L50	Lung Transplant	22	196	2	NA	0	0	1.70526	1.81047	2x100bp	HumanOmni25M-8v1-1_B	20183875	1505013	0.0262279	-0.0230025	0.159746
L50	Lung Transplant	22	268	2	1. Minimal	0	1	6.19274	6.52284	2x100bp	HumanOmni25M-8v1-1_B	17875846	1375749	0.0159843	0.050077	0.0314472
L50	Lung Transplant	22	359	2	NA	0	0	1.95468	2.18883	2x100bp	HumanOmni25M-8v1-1_B	20462203	1662252	0.0326015	-0.0287725	0.0866057
L50	Lung Transplant	22	423	2	NA	0	0	2.86702	2.80668	2x100bp	HumanOmni25M-8v1-1_B	19899454	1580478	0.0255686	-0.0052093	0.116262
L50	Lung Transplant	22	455	2	NA	0	0	1.59528	1.76331	2x100bp	HumanOmni25M-8v1-1_B	17171250	1312822	0.0215394	-0.0214009	0.145481
L50	Lung Transplant	22	471	2	0. Normal	0	1	1.61092	2.16036	50bp	HumanOmni25M-8v1-1_B	22378565	780713	0.0385963	-0.067895	0.122017
L50	Lung Transplant	22	486	2	0. Normal	0	1	2.59316	3.24186	50bp	HumanOmni25M-8v1-1_B	20099172	700883	0.0430846	-0.0602639	0.056089
L50	Lung Transplant	22	661	2	NA	0	0	2.67998	3.1262	2x100bp	HumanOmni25M-8v1-1_B	7120491	588142	-0.00412201	0.0760845	0.155643
L50	Lung Transplant	22	731	2	NA	0	1	1.87924	2.30018	2x100bp	HumanOmni25M-8v1-1_B	15483495	1226669	0.0256557	-0.0256683	0.0906621
L50	Lung Transplant	22	808	2	NA	0	1	2.35282	2.81311	2x100bp	HumanOmni25M-8v1-1_B	5234385	432466	-0.00767988	0.0825542	0.171716
L54	Lung Transplant	64	56	2	2. Mild	0	1	1.44886	1.76917	2x100bp	HumanOmni2.5-8v1_A	11621644	981319	0.0978378	-0.210699	0.0543165
L54	Lung Transplant	64	189	2	2. Mild	0	1	0.96286	1.20844	2x100bp	HumanOmni2.5-8v1_A	27871179	2189096	0.00847903	-0.0342093	0.0453611
L54	Lung Transplant	64	304	2	NA	0	0	0.5089	0.621948	2x100bp	HumanOmni2.5-8v1_A	13782969	1077551	0.0197076	-0.0526554	0.0306024
L54	Lung Transplant	64	388	2	0. Normal	0	0	0.75944	0.876954	2x100bp	HumanOmni2.5-8v1_A	14167998	1095784	0.0221765	-0.0545612	0.0955338
L54	Lung Transplant	64	551	2	0. Normal	0	0	1.518	1.58207	2x100bp	HumanOmni2.5-8v1_A	24242277	1901220	0.0228173	-0.0522761	0.0650546
L57	Lung Transplant	42	40	2	0. Normal	0	1	-0.09376	0.263863	2x100bp	HumanOmni2.5-8v1_A	13140216	900114	0.020314	-0.057053	0.0286919
L57	Lung Transplant	42	106	2	0. Normal	0	1	0.12622	0.608352	2x100bp	HumanOmni2.5-8v1_A	36591661	2821811	-0.0109472	0.0230211	0.133795
L57	Lung Transplant	42	166	2	NA	0	1	0.2151	0.913014	50bp	HumanOmni2.5-8v1_A	29689272	999172	0.0185127	-0.062224	0.0839701
L57	Lung Transplant	42	207	2	0. Normal	0	0	0.62848	3.52689	2x100bp	HumanOmni2.5-8v1_A	31229205	2273920	-0.000174702	0.00879715	0.139606
L57	Lung Transplant	42	263	2	NA	0	0	0.4053	1.6897	50bp	HumanOmni2.5-8v1_A	34919207	1170552	0.00695795	-0.0385273	0.171538
L57	Lung Transplant	42	365	2	NA	0	1	0.14232	0.952982	2x100bp	HumanOmni2.5-8v1_A	15201215	1212967	0.00594132	-0.0154206	0.134099
L57	Lung Transplant	42	438	2	0. Normal	0	1	0.46826	2.38946	2x100bp	HumanOmni2.5-8v1_A	11761727	921621	0.0101804	-0.0272898	0.0709992
L58	Lung Transplant	70	102	1	1. Minimal	0	0	0.79866	0.691644	2x100bp	HumanOmni25M-8v1-1_B	14788659	1260610	0.0045303	-0.0163483	0.0570124
L58	Lung Transplant	70	130	1	1. Minimal	0	1	0.79972	0.875857	2x100bp	HumanOmni25M-8v1-1_B	15137976	1151197	-0.00671489	0.00244241	0.0828501
L58	Lung Transplant	70	176	1	0. Normal	0	0	0.49968	0.487731	2x100bp	HumanOmni25M-8v1-1_B	14350949	1088806	-0.0165621	0.0207626	0.106924
L58	Lung Transplant	70	298	1	NA	0	0	2.20254	2.04704	2x100bp	HumanOmni25M-8v1-1_B	17660294	1354567	0.0108464	-0.0315976	0.0397254
L58	Lung Transplant	70	311	1	NA	0	0	0.8454	0.846995	2x100bp	HumanOmni25M-8v1-1_B	18087130	1424837	0.0121493	-0.0244933	0.0344461
L58	Lung Transplant	70	359	1	4. Severe	1	1	7.76028	8.34964	50bp	HumanOmni25M-8v1-1_B	16812943	591446	-0.00704362	-0.0182067	0.142165
L58	Lung Transplant	70	421	1	NA	1	0	1.6502	1.64872	2x100bp	HumanOmni25M-8v1-1_B	16862298	1344242	0.00245903	-0.0185549	0.071958
L59	Lung Transplant	68	65	2	NA	0	0	0.4557	0.503286	2x100bp	HumanOmni25M-8v1-1_B	22986941	1813771	0.0142374	-0.0389756	0.105216
L59	Lung Transplant	68	107	2	0. Normal	0	0	0.19798	0.313839	2x100bp	HumanOmni25M-8v1-1_B	13465650	1111920	0.00659269	-0.024149	0.133259
L59	Lung Transplant	68	125	2	NA	0	0	0.30414	0.882695	50bp	HumanOmni25M-8v1-1_B	17954431	626812	-0.0117838	-0.0075363	0.188954
L59	Lung Transplant	68	149	2	NA	0	0	0.53666	0.344577	2x100bp	HumanOmni25M-8v1-1_B	12485050	1053891	0.01934	-0.0511275	0.0908013
L59	Lung Transplant	68	191	2	0. Normal	0	0	0.35776	0.374404	2x100bp	HumanOmni25M-8v1-1_B	14669111	1201957	0.0199377	-0.0536298	0.102172
L59	Lung Transplant	68	292	2	NA	0	0	0.29448	0.414263	2x100bp	HumanOmni25M-8v1-1_B	12330726	973349	0.0207888	-0.0459428	0.12291
L59	Lung Transplant	68	352	2	0. Normal	1	1	0.34778	0.403522	2x100bp	HumanOmni25M-8v1-1_B	10780666	899738	0.00679419	-0.0268177	0.157335
L59	Lung Transplant	68	387	2	1. Minimal	0	1	4.30324	4.42431	2x100bp	HumanOmni25M-8v1-1_B	14892823	1110705	0.0191846	-0.0542966	0.106549
L59	Lung Transplant	68	419	2	0. Normal	0	0	8.31086	8.51214	2x100bp	HumanOmni25M-8v1-1_B	20049763	1573306	0.0216595	-0.0519029	0.103618
L59	Lung Transplant	68	488	2	NA	0	1	1.98606	2.5269	2x100bp	HumanOmni25M-8v1-1_B	28074965	971968	0.009598	-0.0289758	0.11105
L6	Lung Transplant	51	43	2	NA	0	0	0.3038	0.594028	50bp	HumanOmni1-Quad_v1-0_C	28329477	130770	0.0225016	-0.0852741	-0.212747
L6	Lung Transplant	51	149	2	0. Normal	0	1	0.36648	0.716322	50bp	HumanOmni1-Quad_v1-0_C	22249771	279923	0.0272647	-0.0848337	0.226073
L6	Lung Transplant	51	185	2	NA	0	0	0.42934	0.951859	50bp	HumanOmni1-Quad_v1-0_C	13521518	169599	0.0299052	-0.0993134	0.208141
L6	Lung Transplant	51	374	2	0. Normal	0	0	0.29476	0.702259	2x100bp	HumanOmni1-Quad_v1-0_C	4417557	136842	0.0059275	-0.0385258	0.103944
L64	Lung Transplant	34	45	2	1. Minimal	0	0	1.2454	1.38289	50bp	HumanOmni25M-8v1-1_B	14922956	530200	-0.0209122	0.000461446	0.209276
L64	Lung Transplant	34	86	2	0. Normal	0	0	0.336	0.35697	50bp	HumanOmni25M-8v1-1_B	56368686	2016339	0.00112793	-0.0298664	0.114896
L64	Lung Transplant	34	143	2	NA	0	0	0.29388	0.34957	50bp	HumanOmni25M-8v1-1_B	19584831	701778	-0.0108294	-0.0278961	0.17297
L64	Lung Transplant	34	170	2	NA	0	0	0.31142	0.332521	50bp	HumanOmni25M-8v1-1_B	25709715	948782	0.0218386	-0.0618311	0.11095
L64	Lung Transplant	34	329	2	0. Normal	0	0	0.87372	1.05014	2x100bp	HumanOmni25M-8v1-1_B	16489256	1303280	-0.0166531	0.0281311	0.147239
L68	Lung Transplant	29	56	2	2. Mild	0	1	0.3014	0.401925	2x100bp	HumanOmni2.5-8v1_A	8953584	717067	-0.0151253	0.897371	-4.36324
L68	Lung Transplant	29	163	2	NA	0	0	0.24706	0.283253	2x100bp	HumanOmni2.5-8v1_A	24652275	1911052	-0.0273088	0.930661	-4.29289
L68	Lung Transplant	29	190	2	NA	0	0	0.04672	0.480126	50bp	HumanOmni2.5-8v1_A	19495532	633391	-0.0524128	0.943384	-2.95889
L68	Lung Transplant	29	303	2	NA	0	0	0.1018	0.216544	2x100bp	HumanOmni2.5-8v1_A	9257061	672640	-0.0428416	0.968235	-4.27876
L68	Lung Transplant	29	373	2	1. Minimal	0	0	0.38988	1.08068	2x100bp	HumanOmni2.5-8v1_A	10662935	851388	-0.0324661	0.955115	-4.26173
L68	Lung Transplant	29	413	2	0. Normal	0	0	0.21228	0.284387	2x100bp	HumanOmni2.5-8v1_A	33967456	2728022	-0.0410897	0.963411	-4.21968
L68	Lung Transplant	29	628	2	NA	NA	0	1.2419	1.54507	2x100bp	HumanOmni2.5-8v1_A	7471944	604723	-0.0549484	1.04372	-4.08648
L69	Lung Transplant	62	30	2	NA	0	0	1.74418	2.07792	2x100bp	HumanOmni25M-8v1-1_B	10039748	812540	-0.0351197	0.930065	-3.92724
L69	Lung Transplant	62	41	2	NA	0	0	0.96476	1.13501	2x100bp	HumanOmni25M-8v1-1_B	15831400	1247258	-0.0316314	0.922925	-3.99384
L69	Lung Transplant	62	51	2	0. Normal	0	0	1.15908	1.26071	2x100bp	HumanOmni25M-8v1-1_B	14307996	1149097	-0.0317782	0.919122	-4.06084
L69	Lung Transplant	62	96	2	0. Normal	0	0	0.54284	0.730075	2x100bp	HumanOmni25M-8v1-1_B	14437255	1129585	-0.0267796	0.917004	-4.24836
L69	Lung Transplant	62	100	2	1. Minimal	0	1	0.44168	0.640169	2x100bp	HumanOmni25M-8v1-1_B	14102584	1096635	-0.0292758	0.912636	-4.23896
L69	Lung Transplant	62	136	2	0. Normal	0	0	0.28842	0.44022	2x100bp	HumanOmni25M-8v1-1_B	21998132	1767991	-0.0410127	0.948368	-4.29106
L69	Lung Transplant	62	193	2	NA	0	1	0.5757	0.587475	2x100bp	HumanOmni25M-8v1-1_B	11394416	893859	-0.0323909	0.926089	-4.27499
L69	Lung Transplant	62	277	2	NA	0	0	0.37458	0.533567	2x100bp	HumanOmni25M-8v1-1_B	13899428	1023474	-0.0600858	0.951965	-4.25865
L7	Lung Transplant	58	599	1	NA	0	0	1.15108	1.32178	50bp	HumanOmni2.5-8v1_A	18628287	595728	-0.0489926	0.945274	-2.9342
L7	Lung Transplant	58	781	1	NA	0	0	1.1864	1.25419	2x100bp	HumanOmni2.5-8v1_A	21623069	1545742	-0.0538278	0.985445	-4.00475
L74	Lung Transplant	71	0	1	NA	0	0	45.4116	43.5803	2x100bp	HumanOmni2.5-8v1_A	37364556	1852276	0.00311693	0.504317	-0.836052
L74	Lung Transplant	71	0	1	NA	0	0	34.5143	32.8963	2x100bp	HumanOmni2.5-8v1_A	29976800	2194110	0.0137866	0.377567	-0.646335
L74	Lung Transplant	71	1	1	NA	0	0	24.591	23.3612	2x100bp	HumanOmni2.5-8v1_A	2984011	215796	-0.019153	0.323531	-0.388671
L74	Lung Transplant	71	1	1	NA	0	0	17.4362	15.8018	2x100bp	HumanOmni2.5-8v1_A	11086219	778064	0.021116	0.177577	-0.256225
L74	Lung Transplant	71	1	1	NA	0	0	11.8942	10.7553	2x100bp	HumanOmni2.5-8v1_A	12605442	909339	0.00767274	0.126957	-0.176281
L74	Lung Transplant	71	2	1	NA	0	0	3.4237	3.27972	2x100bp	HumanOmni2.5-8v1_A	11024408	815480	-0.00595036	0.0489701	-0.0127916
L74	Lung Transplant	71	7	1	NA	0	0	1.49196	1.5281	2x100bp	HumanOmni2.5-8v1_A	12461413	929538	-0.00703064	0.0150335	-0.00618899
L74	Lung Transplant	71	13	1	NA	0	0	2.17782	2.27189	2x100bp	HumanOmni2.5-8v1_A	13101505	965481	-0.0108407	0.0372601	0
L74	Lung Transplant	71	44	1	NA	0	0	0.14742	0.370824	2x100bp	HumanOmni2.5-8v1_A	10956255	866401	0.0117079	-0.0312601	-0.0183432
L74	Lung Transplant	71	55	1	NA	0	0	0.5197	0.608016	2x100bp	HumanOmni2.5-8v1_A	11853521	952018	0.0292897	-0.0607679	-0.0882724
L74	Lung Transplant	71	90	1	NA	0	0	0.63482	0.654398	2x100bp	HumanOmni2.5-8v1_A	21847236	1747975	0.0183112	-0.038179	-0.0582364
L74	Lung Transplant	71	126	1	NA	0	0	0.63804	0.826966	50bp	HumanOmni2.5-8v1_A	18381948	623589	0.00422121	-0.0428419	0.060903
L74	Lung Transplant	71	164	1	NA	0	0	0.27102	0.464701	50bp	HumanOmni2.5-8v1_A	20651329	699593	-0.00944529	-0.00607067	0.103412
L74	Lung Transplant	71	297	1	NA	0	0	0.68366	0.931995	50bp	HumanOmni2.5-8v1_A	37393951	1293753	0.0382394	-0.0976268	0.00341619
L74	Lung Transplant	71	364	1	0. Normal	0	0	0.36206	0.378859	2x100bp	HumanOmni2.5-8v1_A	29029204	2271741	0.0415447	-0.0888598	-0.0896166
L75	Lung Transplant	59	2	2	NA	0	0	17.3629	15.9304	2x100bp	HumanOmni25M-8v1-1_B	24448366	1911789	0.00591627	-0.0302862	0.119555
L75	Lung Transplant	59	2	2	NA	0	0	11.2157	10.617	2x100bp	HumanOmni25M-8v1-1_B	20066823	1524778	-0.00694753	-0.00402965	0.153391
L75	Lung Transplant	59	3	2	NA	0	0	8.01848	7.64232	2x100bp	HumanOmni25M-8v1-1_B	7240310	565406	-0.00905377	-0.00359385	0.166536
L75	Lung Transplant	59	7	2	NA	0	0	2.55554	2.43211	2x100bp	HumanOmni25M-8v1-1_B	15227087	1158823	-0.0189058	0.00533279	0.161138
L75	Lung Transplant	59	16	2	NA	0	0	1.94296	2.03861	2x100bp	HumanOmni25M-8v1-1_B	12698015	1013230	0.00444498	-0.0372812	0.125404
L75	Lung Transplant	59	45	2	NA	0	0	0.42548	0.520395	2x100bp	HumanOmni25M-8v1-1_B	8116420	671644	0.0123945	-0.039117	0.126584
L75	Lung Transplant	59	52	2	0. Normal	0	0	0.53958	0.686683	2x100bp	HumanOmni25M-8v1-1_B	12419505	958298	-0.0182317	0.0278109	0.176052
L75	Lung Transplant	59	80	2	0. Normal	0	0	0.66328	0.594974	2x100bp	HumanOmni25M-8v1-1_B	24772649	2040913	0.00903774	-0.0356026	0.113718
L75	Lung Transplant	59	153	2	0. Normal	0	0	0.03592	0.221263	2x100bp	HumanOmni25M-8v1-1_B	6081497	506552	0.00338111	-0.0285692	0.153724
L75	Lung Transplant	59	170	2	NA	0	0	0.01518	0.167072	2x100bp	HumanOmni25M-8v1-1_B	8356052	695741	0.00191495	-0.0223633	0.158204
L75	Lung Transplant	59	268	2	0. Normal	0	0	0.55248	0.467603	2x100bp	HumanOmni25M-8v1-1_B	7889187	628263	0.0172252	-0.0384288	0.127393
L75	Lung Transplant	59	367	2	1. Minimal	NA	0	1.30852	1.3587	2x100bp	HumanOmni25M-8v1-1_B	23117308	1828843	0.00520833	-0.0309428	0.141231
L75	Lung Transplant	59	456	2	0. Normal	0	1	0.28882	0.353457	2x100bp	HumanOmni25M-8v1-1_B	13535606	1151582	-0.0267419	0.0510952	0.227698
L77	Lung Transplant	56	1	2	NA	0	0	14.9333	15.5808	2x100bp	HumanOmni2.5-8v1_A	10446270	724663	-0.0290971	0.843365	-2.26244
L77	Lung Transplant	56	1	2	NA	0	0	13.0093	13.6225	2x100bp	HumanOmni2.5-8v1_A	19183806	1322549	-0.0390433	0.869915	-2.35558
L77	Lung Transplant	56	2	2	NA	0	0	14.0952	14.5158	2x100bp	HumanOmni2.5-8v1_A	15568927	1121540	-0.0277678	0.84687	-2.28774
L77	Lung Transplant	56	2	2	NA	0	0	20.4882	20.6336	2x100bp	HumanOmni2.5-8v1_A	14308532	992595	-0.0308918	0.804318	-1.82424
L77	Lung Transplant	56	3	2	NA	0	0	10.736	9.89458	2x100bp	HumanOmni2.5-8v1_A	13736598	990878	-0.00909649	0.850382	-2.60736
L77	Lung Transplant	56	12	2	NA	1	1	1.63142	2.12474	2x100bp	HumanOmni2.5-8v1_A	8630203	573700	-0.0406743	0.928193	-3.95039
L77	Lung Transplant	56	27	2	NA	0	0	1.12264	1.39905	2x100bp	HumanOmni2.5-8v1_A	23067563	1686175	-0.035405	0.922923	-4.17795
L77	Lung Transplant	56	50	2	NA	0	0	0.55098	0.641083	2x100bp	HumanOmni2.5-8v1_A	25261115	1864598	-0.0406799	0.936719	-4.36609
L77	Lung Transplant	56	61	2	NA	0	0	0.3608	0.681556	50bp	HumanOmni2.5-8v1_A	19906511	657587	-0.0550439	0.926043	-3.02077
L77	Lung Transplant	56	91	2	NA	0	0	0.49992	0.717164	50bp	HumanOmni2.5-8v1_A	18436387	602598	-0.0632759	0.951883	-3.02527
L78	Lung Transplant	11	22	2	2. Mild	NA	0	1.69752	1.70824	2x100bp	HumanOmni2.5-8v1_A	22561103	1673843	-0.0311024	1.00282	-4.28415
L78	Lung Transplant	11	47	2	0. Normal	0	0	1.0922	1.01881	2x100bp	HumanOmni2.5-8v1_A	23400003	1670589	-0.0440951	0.966487	-4.50024
L78	Lung Transplant	11	55	2	NA	0	0	1.00994	1.16098	2x100bp	HumanOmni2.5-8v1_A	25619946	1619049	-0.0613624	0.995307	-4.36731
L78	Lung Transplant	11	103	2	0. Normal	NA	0	1.26212	1.24354	2x100bp	HumanOmni2.5-8v1_A	10872107	830592	-0.0103769	0.938906	-4.3222
L78	Lung Transplant	11	175	2	2. Mild	0	1	0.58738	0.939868	2x100bp	HumanOmni2.5-8v1_A	9418795	719666	-0.0303027	0.953718	-4.43235
L79	Lung Transplant	38	6	2	NA	0	0	3.0804	3.45814	2x100bp	HumanOmni25M-8v1-1_B	11472209	830453	-0.0342475	0.933601	-4.40395
L79	Lung Transplant	38	12	2	NA	0	0	0.84086	0.790218	2x100bp	HumanOmni25M-8v1-1_B	13440592	1062692	-0.0141066	0.919944	-4.36919
L79	Lung Transplant	38	44	2	NA	0	0	0.04828	0.18351	2x100bp	HumanOmni25M-8v1-1_B	14715623	1199846	-0.0143316	0.883808	-4.44356
L79	Lung Transplant	38	55	2	2. Mild	0	1	-0.07156	0.136074	2x100bp	HumanOmni25M-8v1-1_B	11433669	916971	-0.0324851	0.931331	-4.40761
L79	Lung Transplant	38	86	2	0. Normal	0	0	-0.09736	0.106697	2x100bp	HumanOmni25M-8v1-1_B	11183009	892377	-0.0277654	0.906743	-4.36818
L79	Lung Transplant	38	121	2	NA	0	0	-0.10572	0.157538	2x100bp	HumanOmni25M-8v1-1_B	10161835	840201	-0.0271961	0.90936	-4.47239
L79	Lung Transplant	38	188	2	NA	0	0	-0.0077	0.166683	2x100bp	HumanOmni25M-8v1-1_B	11640282	961676	-0.0311117	0.926463	-4.4049
L79	Lung Transplant	38	198	2	0. Normal	0	0	-0.04234	0.133962	2x100bp	HumanOmni25M-8v1-1_B	12547378	989266	-0.0143428	0.909992	-4.3213
L79	Lung Transplant	38	370	2	NA	0	0	0.2473	0.62968	2x100bp	HumanOmni25M-8v1-1_B	7738477	643873	-0.0585549	1.00843	-4.29735
L8	Lung Transplant	31	48	2	1. Minimal	0	0	0.90368	1.38949	50bp	HumanOmni1-Quad_v1-0_C	9681708	139953	0.0170102	-0.0599337	0.196468
L8	Lung Transplant	31	187	2	3. Moderate	0	1	1.24224	2.04888	50bp	HumanOmni1-Quad_v1-0_C	11108017	182951	0.0923215	-0.235895	0.105927
L8	Lung Transplant	31	240	2	0. Normal	0	0	1.07302	1.08934	50bp	HumanOmni1-Quad_v1-0_C	12253956	201815	0.0894581	-0.232329	0.111338
L8	Lung Transplant	31	352	2	0. Normal	0	0	1.50668	1.60404	50bp	HumanOmni1-Quad_v1-0_C	18122600	270130	-0.0109001	0.0134802	0.262624
L8	Lung Transplant	31	440	2	NA	0	0	1.40446	1.38124	2x100bp	HumanOmni1-Quad_v1-0_C	13822061	549440	0.0239205	-0.0583673	0.0808097
L8	Lung Transplant	31	720	2	NA	0	0	1.15498	1.41917	50bp	HumanOmni1-Quad_v1-0_C	20795529	309326	0.00145676	-0.0379645	0.181315
L80	Lung Transplant	33	12	2	NA	0	0	0.3636	0.523035	2x100bp	HumanOmni2.5-8v1_A	29749807	2145024	-0.024207	0.0231015	0.168214
L80	Lung Transplant	33	15	2	NA	0	0	0.53846	0.616809	2x100bp	HumanOmni2.5-8v1_A	26100012	1953898	-0.0234172	0.0188218	0.157995
L80	Lung Transplant	33	46	2	2. Mild	0	1	0.93544	1.34172	2x100bp	HumanOmni2.5-8v1_A	16660316	1241609	-0.0323156	0.0376756	0.156716
L80	Lung Transplant	33	70	2	NA	0	0	2.49122	2.88581	2x100bp	HumanOmni2.5-8v1_A	23341570	1905901	-0.00300256	-0.00910269	0.122669
L80	Lung Transplant	33	97	2	0. Normal	0	0	1.09658	1.55045	2x100bp	HumanOmni2.5-8v1_A	12861395	988384	-0.000864098	-0.00905293	0.123561
L81	Lung Transplant	59	1	2	NA	0	0	43.6282	43.7578	2x100bp	HumanOmni2.5-8v1_A	24107344	1601716	-0.0279416	0.612231	-0.986757
L81	Lung Transplant	59	1	2	NA	0	0	43.2831	42.6218	2x100bp	HumanOmni2.5-8v1_A	21195581	1380505	-0.0268259	0.617186	-0.978618
L81	Lung Transplant	59	2	2	NA	0	0	20.5206	19.522	2x100bp	HumanOmni2.5-8v1_A	26209579	1907149	-0.0316243	0.813703	-1.94709
L81	Lung Transplant	59	2	2	NA	0	0	18.3442	17.9827	2x100bp	HumanOmni2.5-8v1_A	24743559	1817614	-0.02349	0.817783	-2.08445
L81	Lung Transplant	59	3	2	NA	0	0	12.7223	12.1928	2x100bp	HumanOmni2.5-8v1_A	23315952	1755941	-0.0363518	0.873905	-2.52726
L81	Lung Transplant	59	7	2	NA	0	0	4.87418	4.45849	2x100bp	HumanOmni2.5-8v1_A	23979933	1835044	-0.0305456	0.905713	-3.49334
L81	Lung Transplant	59	16	2	NA	0	0	1.17156	1.30631	2x100bp	HumanOmni2.5-8v1_A	22104846	1739276	-0.0343759	0.941592	-4.12869
L81	Lung Transplant	59	59	2	2. Mild	0	1	0.44784	0.645408	2x100bp	HumanOmni2.5-8v1_A	24780291	1932503	-0.0257558	0.931049	-4.37499
L81	Lung Transplant	59	93	2	0. Normal	0	0	0.3142	0.470551	2x100bp	HumanOmni2.5-8v1_A	24197375	1814494	-0.0158974	0.925245	-4.45176
L81	Lung Transplant	59	149	2	NA	0	0	0.59874	0.629393	2x100bp	HumanOmni2.5-8v1_A	12524019	931162	-0.0307236	0.951722	-4.33243
L81	Lung Transplant	59	191	2	NA	0	0	0.6072	0.500089	2x100bp	HumanOmni2.5-8v1_A	17580024	1391169	-0.0105775	0.924937	-4.3981
L81	Lung Transplant	59	366	2	NA	NA	0	0.34654	0.623348	2x100bp	HumanOmni2.5-8v1_A	6314765	517299	-0.0535157	1.02674	-4.15328
L82	Lung Transplant	75	43	2	1. Minimal	0	1	0.80834	0.891036	2x100bp	HumanOmni25M-8v1-1_B	22259943	1843368	0.0141289	-0.0321184	0.0440671
L85	Lung Transplant	11	28	2	0. Normal	0	0	0.91616	0.988676	2x100bp	HumanOmni25M-8v1-1_B	17251825	1391330	-0.031278	0.949919	-4.34425
L85	Lung Transplant	11	99	2	1. Minimal	NA	0	1.19942	1.73698	50bp	HumanOmni25M-8v1-1_B	39865773	1405231	-0.0110298	0.903649	-3.00996
L85	Lung Transplant	11	127	2	0. Normal	0	0	0.76282	1.29013	50bp	HumanOmni25M-8v1-1_B	10154665	353490	-0.0260832	0.913417	-2.81291
L85	Lung Transplant	11	196	2	0. Normal	0	0	0.73254	0.687133	2x100bp	HumanOmni25M-8v1-1_B	17093128	1422154	0.0061654	0.896231	-4.26991
L85	Lung Transplant	11	280	2	NA	0	0	0.16208	0.271097	2x100bp	HumanOmni25M-8v1-1_B	20614210	1715632	-0.0160116	0.937582	-4.28165
L85	Lung Transplant	11	372	2	2. Mild	0	1	2.53204	2.39865	2x100bp	HumanOmni25M-8v1-1_B	7601853	666875	-0.00163051	0.994408	-3.86983
L9	Lung Transplant	56	13	2	NA	0	0	2.37918	2.56947	50bp	HumanOmni1-Quad_v1-0_C	36557292	559639	0.0470672	-0.155331	0.14708
L9	Lung Transplant	56	42	2	NA	0	0	5.66382	5.56916	50bp	HumanOmni1-Quad_v1-0_C	33856452	498673	0.0249079	-0.0896338	0.151418
L9	Lung Transplant	56	56	2	0. Normal	0	0	3.67406	3.34889	50bp	HumanOmni1-Quad_v1-0_C	31550432	468975	0.0741919	-0.23673	0.0512759
L9	Lung Transplant	56	91	2	NA	0	1	1.41428	1.23146	50bp	HumanOmni1-Quad_v1-0_C	62426428	918861	0.0431602	-0.12404	0.0978352
L9	Lung Transplant	56	111	2	1. Minimal	0	0	1.86486	1.73504	50bp	HumanOmni1-Quad_v1-0_C	35813607	525543	0.0243162	-0.0812993	0.132005
L9	Lung Transplant	56	176	2	NA	0	0	0.79838	1.09917	50bp	HumanOmni1-Quad_v1-0_C	30022521	459014	0.0434588	-0.122532	0.152655
L9b	Lung Transplant	56	16	2	2. Mild	0	0	0.92586	3.77241	2x100bp	HumanOmni1-Quad_v1-0_C	10482568	369697	0.00416689	-0.0137232	0.117659
L9b	Lung Transplant	56	47	2	0. Normal	0	0	0.29226	0.730599	2x100bp	HumanOmni1-Quad_v1-0_C	12917256	463854	0.0168614	-0.0385271	0.0891988
L9b	Lung Transplant	56	84	2	NA	0	0	0.02178	0.358374	2x100bp	HumanOmni1-Quad_v1-0_C	9780876	360850	0.0173242	-0.0431669	0.0811635
L9b	Lung Transplant	56	106	2	0. Normal	0	0	0.2244	0.436086	2x100bp	HumanOmni1-Quad_v1-0_C	8814458	319859	0.0163708	-0.0446508	0.093685
L9b	Lung Transplant	56	288	2	0. Normal	0	0	0.16228	1.2461	2x100bp	HumanOmni1-Quad_v1-0_C	11704333	431828	0.00869693	-0.0373808	0.0855799
L9b	Lung Transplant	56	324	2	NA	0	0	0.40096	1.60468	2x100bp	HumanOmni1-Quad_v1-0_C	14629682	528103	0.0210595	-0.0462992	0.0917352
L9b	Lung Transplant	56	345	2	NA	0	1	0.20154	0.852089	2x100bp	HumanOmni1-Quad_v1-0_C	14249119	487206	-0.0123878	0.00478993	0.144665
L9b	Lung Transplant	56	373	2	NA	0	0	0.29602	0.905486	2x100bp	HumanOmni1-Quad_v1-0_C	12978902	475622	-0.00893892	-0.00349813	0.135714
L9b	Lung Transplant	56	540	2	0. Normal	0	0	-0.00408	0.380911	2x100bp	HumanOmni1-Quad_v1-0_C	16802079	612958	0.0278127	-0.0452656	0.0952456
