# Supplementary material for: Quantification of transplant-derived circulating cell-free DNA in absence of a donor genotype
Source: PLOS journal article supplement (doi:10.1371/journal.pcbi.1005629), 2017-08-03

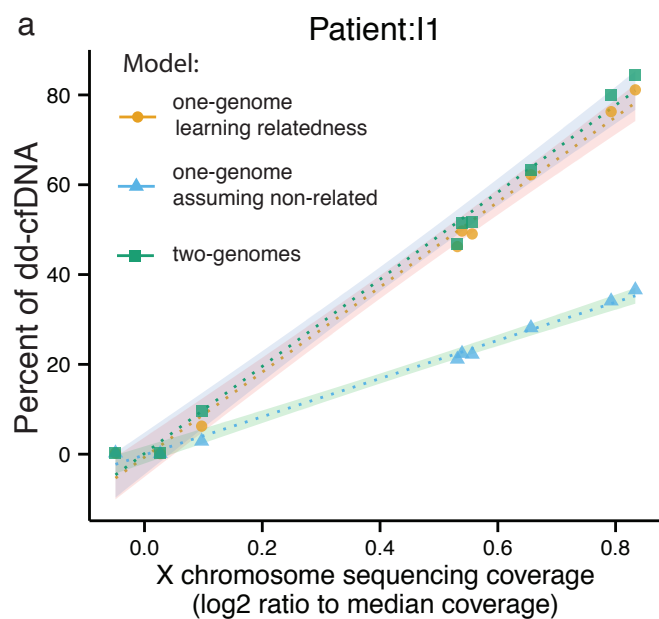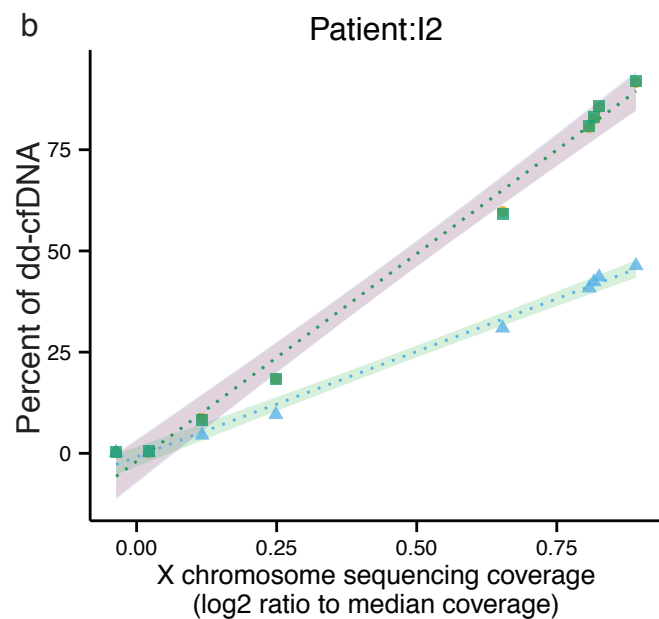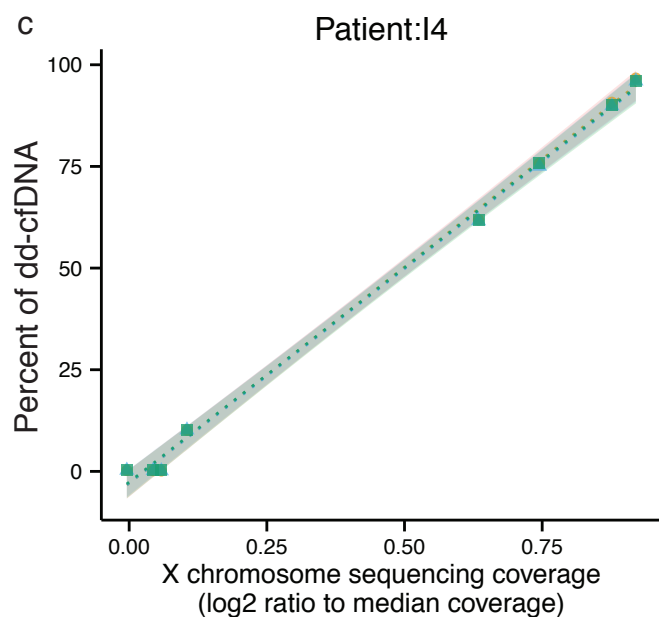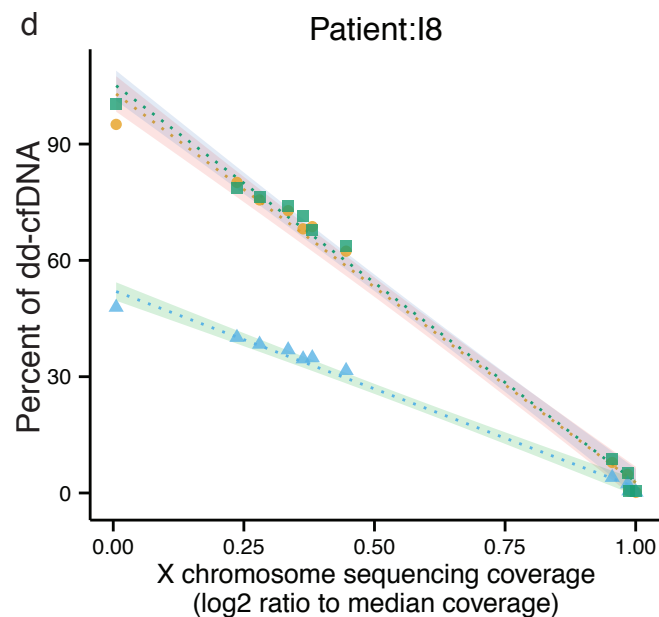

Supplement: S10 (10.1371/journal.pcbi.1005629.s010) [file journal.pcbi.1005629.s010]
